# Supplementary material for: The Relations Among Stress, Executive Functions, and Harsh Parenting in Mothers
Source: Springer Nature journal article supplement (doi:10.1007/s10802-020-00622-x), 2020-01-29
Supplement: MOESM1 [file 17607330]

*Table S1.* Means, standard deviations, and ranges for perceived stress (SVAS) as a manipulation check for the stress group and the control group.

|  | **Stress (*n* = 52)** | | **Control (*n* = 49)** | |
| --- | --- | --- | --- | --- |
| ***M* *(SD)*** | **Range** | ***M (SD)*** | **Range** |
| T0 SVAS | 2.79 (3.05) | 0.00-10.30 | 2.42 (2.94) | 0.00-10.20 |
| T1 SVAS | 6.04 (4.40) | 0.00-15.00 | 3.78 (3.41) | 0.00-11.30 |
| T2 SVAS | 8.34 (4.76) | 0.60-15.00 | 2.90 (3.27) | 0.00-14.50 |
| T3 SVAS | 7.10 (4.59) | 0.00-14.70 | 3.02 (3.31) | 0.00-14.50 |
| Overall SVAS (T1, T2 and T3 Average) | 7.16 (3.95) | 0.57-14.10 | 3.30 (3.07) | 0.00-13.43 |
| *Note.* Stress levels from the SVAS were measured on a 15 cm line. Therefore, the possible range of stress rated on the SVAS is from 0 to 15. T0 = Baseline; T1 = After the instructions were presented for either stress or control task; T2 = After the first stress/control task is completed; T3 = After the second stress/control task is completed; SVAS = Stress Visual Analogue Scale | | | | |
